# Supplementary material for: [CdCl4]2−anion-induced coordination of Ln3+to cucurbit[8]uril and the formation of supramolecular self-assemblies: potential application in isolation of light lanthanides
Source: Royal Society of Chemistry journal article supplement (doi:10.1039/c3ce41769g), 2013-11-05
Supplement: c3ce41769g.pdf [file c3ce41769g.pdf]

## Supplementary Information

# $[\text{CdCl}_4]^{2-}$ Anion-induced Coordination of $\text{Ln}^{3+}$ to Cucurbit[8]uril and The Formation of Supramolecular Self-Assemblies: Potential Application in Isolation of Light Lanthanides

*Xiao-Jie Cheng, Ning-Ning Ji, Yi Zhao, Li-Li Liang, Xin Xiao, Yun-Qian Zhang, Sai-Feng Xue, Qian-Jiang Zhu\* and Zhu Tao*

Key Laboratory of Macrocyclic and Supramolecular Chemistry of Guizhou Province, Guizhou University, Guiyang 550025, China

### Contents:

### EXPERIMENTAL SECTION

**Synthesis:** Chemicals, such as lanthanide nitrates and hydrochloric acid, were of reagent grade and were used without further purification. Q[8] was prepared as reported elsewhere.<sup>1a</sup> Elemental analyses were carried out on a EURO EA-3000 elemental analyzer. Aqueous HCl ( $6.0 \text{ mol}\cdot\text{L}^{-1}$ ) was used to prepare crystals of Q[8]-Ln(III) in the presence of  $\text{CdCl}_2$ . A similar process was used to prepare crystals of related compounds:  $\text{Ln}(\text{NO}_3)_3\cdot x\text{H}_2\text{O}$  (0.106 mmol) and  $\text{CdCl}_2$  (6.08 mg, 0.033 mmol) were dissolved in 2.0 mL  $6.0 \text{ mol}\cdot\text{L}^{-1}$  HCl (solution A), Q[8] (10 mg, 0.007 mmol) was dissolved in 2.0 mL  $6.0 \text{ mol}\cdot\text{L}^{-1}$  HCl (solution B), and was then added in the solution A with stirring for the Ln-Q[8]- $\text{Cd}^{2+}$  systems. X-ray quality crystals were obtained from the solution over a period of 1-3 days. The color of crystals was dependent on the lanthanide ions. Summarizing the preparations,  $\{\text{Ce}_4(\text{NO}_3)_2(\text{H}_2\text{O})_{24}\text{Q}[8]\}\cdot\text{Q}[8]\cdot 2[\text{CdCl}_4]\cdot 6\text{Cl}\cdot 45(\text{H}_2\text{O})$  (**2**) was obtained from  $\text{Ce}(\text{NO}_3)_3\cdot 6\text{H}_2\text{O}$  (0.046g);  $\{\text{Nd}_4(\text{NO}_3)_2(\text{H}_2\text{O})_{24}\text{Q}[8]\}\cdot\text{Q}[8]\cdot 2[\text{CdCl}_4]\cdot 6\text{Cl}\cdot 48(\text{H}_2\text{O})$  (**4**) was obtained from  $\text{Nd}(\text{NO}_3)_3\cdot 0.035 \text{ g}$ ;  $\{\text{Sm}_4(\text{NO}_3)_2(\text{H}_2\text{O})_{24}\text{Q}[8]\}\cdot\text{Q}[8]\cdot 2[\text{CdCl}_4]\cdot 6\text{Cl}\cdot 53(\text{H}_2\text{O})$  (**6**) was obtained from

$\text{Sm}(\text{NO}_3)_3 \cdot 6\text{H}_2\text{O}$  (0.047 g);  $\{\text{Eu}_4(\text{NO}_3)_2 (\text{H}_2\text{O})_{24}\text{Q}[8]\} \cdot \text{Q}[8] \cdot 2[\text{CdCl}_4] \cdot 6\text{Cl} \cdot 70(\text{H}_2\text{O})$  (**7**) was obtained from  $\text{Eu}(\text{NO}_3)_3 \cdot 6\text{H}_2\text{O}$  (0.047 g);  $\{\text{Gd}(\text{H}_2\text{O})_4(\text{Q}[8])_2\} \cdot 4\text{Cl} \cdot (\text{H}_3\text{O}) \cdot 61(\text{H}_2\text{O})$  (**8**) was obtained from  $\text{Gd}(\text{NO}_3)_3 \cdot 6\text{H}_2\text{O}$  (0.048 g);  $\{\text{Tb}(\text{H}_2\text{O})_4(\text{Q}[8])_2\} \cdot 4\text{Cl} \cdot (\text{H}_3\text{O}) \cdot 64(\text{H}_2\text{O})$  (**9**) was obtained from  $\text{Tb}(\text{NO}_3)_3$  (0.037 g);  $\{\text{Ho}(\text{H}_2\text{O})_4(\text{Q}[8])_2\} \cdot 4\text{Cl} \cdot (\text{H}_3\text{O}) \cdot 66(\text{H}_2\text{O})$  (**11**) was obtained from  $\text{Ho}(\text{NO}_3)_3$  (0.037 g);  $\{\text{Er}(\text{H}_2\text{O})_4(\text{Q}[8])_2\} \cdot 4\text{Cl} \cdot (\text{H}_3\text{O}) \cdot 67(\text{H}_2\text{O})$  (**12**) was obtained from  $\text{Er}(\text{NO}_3)_3 \cdot 5\text{H}_2\text{O}$  (0.047 g);  $\{\text{Tm}(\text{H}_2\text{O})_4(\text{Q}[8])_2\} \cdot 4\text{Cl} \cdot (\text{H}_3\text{O}) \cdot 70(\text{H}_2\text{O})$  (**13**) was obtained from  $\text{Tm}(\text{NO}_3)_3$  (0.038 g);  $\{\text{Yb}(\text{H}_2\text{O})_4(\text{Q}[8])_2\} \cdot 4\text{Cl} \cdot (\text{H}_3\text{O}) \cdot 65(\text{H}_2\text{O})$  (**14**) was obtained from  $\text{Yb}(\text{NO}_3)_3 \cdot 5\text{H}_2\text{O}$  (0.048 g);  $\{\text{Lu}(\text{H}_2\text{O})_4(\text{Q}[8])_2\} \cdot 4\text{Cl} \cdot (\text{H}_3\text{O}) \cdot 67(\text{H}_2\text{O})$  (**15**) was obtained from  $\text{Lu}(\text{NO}_3)_3$  (0.038 g); Elemental analysis results for the eleven compounds are given in Table 1.

It should be noted that 1) the compounds (**1~5, 10**) is corresponding to La, Ce, Pr, Nd, Pm and Dy, but we did not obtained crystals of **1, 3** and **10** which were suitable for determination (except Pm), 2) in order to show the whole systems, the crystal data and structure refinement details of these two compounds are also listed in the corresponding tables.

**Table 1. Elemental Analysis Results (%)**

| Results  | 2     | 4     | 6     | 7     | 8     | 9     | 11    | 12    | 13    | 14    | 15    |
|----------|-------|-------|-------|-------|-------|-------|-------|-------|-------|-------|-------|
| C calcd. | 21.73 | 21.44 | 21.00 | 19.86 | 27.80 | 27.43 | 27.16 | 27.04 | 26.68 | 27.22 | 26.98 |
| found    | 21.87 | 21.65 | 20.88 | 19.44 | 28.03 | 27.56 | 27.21 | 27.21 | 26.77 | 27.31 | 27.08 |
| H calcd. | 4.44  | 4.50  | 4.59  | 4.93  | 5.57  | 5.64  | 5.68  | 5.70  | 5.77  | 5.64  | 5.69  |
| found    | 4.34  | 4.36  | 4.44  | 4.98  | 5.39  | 5.46  | 5.55  | 5.58  | 5.65  | 5.60  | 5.56  |
| N calcd. | 17.42 | 17.19 | 16.83 | 15.93 | 21.62 | 21.34 | 21.13 | 21.04 | 20.76 | 21.17 | 20.99 |
| found    | 17.51 | 17.32 | 16.84 | 15.66 | 21.75 | 21.47 | 21.30 | 21.27 | 20.85 | 21.21 | 21.06 |

**X-ray crystallography:** A suitable single crystal ( $\sim 0.2 \times 0.2 \times 0.1 \text{ mm}^3$ ) was taken up in paraffin oil and mounted on a Bruker SMART Apex II CCD diffractometer equipped with a graphite-monochromated Mo- $K_\alpha$  ( $\lambda = 0.71073 \text{ \AA}$ ,  $\mu = 0.828 \text{ mm}^{-1}$ ) radiation source operating in the  $\omega$ -scan mode and a nitrogen cold stream ( $-50 \text{ C}$ ). Data were corrected for Lorentz and polarization effects (SAINT), and semi-empirical absorption corrections based on equivalent reflections were also applied (SADABS). The structure was elucidated by direct methods and refined by the full-matrix least-squares method on  $F^2$  with the SHELXS-97 and SHELXL-97 program packages, respectively.<sup>14</sup> All non-hydrogen atoms were refined anisotropically. Carbon-bound hydrogen atoms were introduced at calculated positions, and were treated as riding atoms with an isotropic displacement parameter equal to 1.2 times that of the parent atom. Most of the water molecules in the compounds were omitted using the SQUEEZE option of the PLATON program. The squeezed water molecules

are listed in the Table 2. Analytical expressions for neutral-atom scattering factors were employed, and anomalous dispersion corrections were incorporated. Details of the crystal parameters, data collection conditions, and refinement parameters for the twenty five compounds are summarized in Table 2. In addition, the crystallographic data for the reported structures have been deposited at the Cambridge Crystallographic Data Centre as supplementary publication nos. CCDC-952098 (**2**), 952099 (**4**), 952100 (**6**), 952101 (**7**), 952102 (**8**), 952103 (**9**), 952104 (**11**), 952105 (**12**), 952106 (**13**), 952107 (**14**), 952108 (**15**). These data can be obtained free of charge via [http://www.ccdc.cam.ac.uk/data\\_request/cif](http://www.ccdc.cam.ac.uk/data_request/cif), or by emailing [data\\_request@ccdc.cam.ac.uk](mailto:data_request@ccdc.cam.ac.uk), or by contacting The Cambridge Crystallographic Data Centre, 12, Union Road, Cambridge CB2 1EZ, UK; fax: +44 1223 336033.

**Table 2.** Crystal Data and Structure Refinement Details for Compounds

| Compound                                | 2                                                                                                                  | 4                                                                                                                  | 6                                                                                                                  | 7                                                                                                                  | 8                                                                                  | 9                                                                                   | 11                                                                                  | 12                                                                                  | 13                                                                                  | 14                                                                                  | 15                                                                                  |
|-----------------------------------------|--------------------------------------------------------------------------------------------------------------------|--------------------------------------------------------------------------------------------------------------------|--------------------------------------------------------------------------------------------------------------------|--------------------------------------------------------------------------------------------------------------------|------------------------------------------------------------------------------------|-------------------------------------------------------------------------------------|-------------------------------------------------------------------------------------|-------------------------------------------------------------------------------------|-------------------------------------------------------------------------------------|-------------------------------------------------------------------------------------|-------------------------------------------------------------------------------------|
| Empirical formula                       | C <sub>96</sub> H <sub>234</sub> N <sub>66</sub> O <sub>107</sub> Cd <sub>2</sub> Ce <sub>4</sub> Cl <sub>14</sub> | C <sub>96</sub> H <sub>240</sub> N <sub>66</sub> O <sub>110</sub> Cd <sub>2</sub> Nd <sub>4</sub> Cl <sub>14</sub> | C <sub>96</sub> H <sub>250</sub> N <sub>66</sub> O <sub>115</sub> Cd <sub>2</sub> Sm <sub>4</sub> Cl <sub>14</sub> | C <sub>96</sub> H <sub>284</sub> N <sub>66</sub> O <sub>132</sub> Cd <sub>2</sub> Eu <sub>4</sub> Cl <sub>14</sub> | C <sub>96</sub> H <sub>229</sub> N <sub>64</sub> O <sub>98</sub> GdCl <sub>4</sub> | C <sub>96</sub> H <sub>235</sub> N <sub>64</sub> O <sub>101</sub> TbCl <sub>4</sub> | C <sub>96</sub> H <sub>239</sub> N <sub>64</sub> O <sub>103</sub> HoCl <sub>4</sub> | C <sub>96</sub> H <sub>241</sub> N <sub>64</sub> O <sub>104</sub> ErCl <sub>4</sub> | C <sub>96</sub> H <sub>247</sub> N <sub>64</sub> O <sub>107</sub> TmCl <sub>4</sub> | C <sub>96</sub> H <sub>237</sub> N <sub>64</sub> O <sub>102</sub> YbCl <sub>4</sub> | C <sub>96</sub> H <sub>241</sub> N <sub>64</sub> O <sub>104</sub> LuCl <sub>4</sub> |
| Formula weight                          | 5307.07                                                                                                            | 5377.60                                                                                                            | 5492.12                                                                                                            | 5804.83                                                                                                            | 4147.48                                                                            | 4203.20                                                                             | 4245.24                                                                             | 4265.59                                                                             | 4321.31                                                                             | 4235.34                                                                             | 4255.57                                                                             |
| Crystal system                          | Triclinic                                                                                                          | Triclinic                                                                                                          | Triclinic                                                                                                          | Triclinic                                                                                                          | Tetragonal                                                                         | Tetragonal                                                                          | Tetragonal                                                                          | Tetragonal                                                                          | Tetragonal                                                                          | Tetragonal                                                                          | Tetragonal                                                                          |
| Space group                             | P-1                                                                                                                | P-1                                                                                                                | P-1                                                                                                                | P-1                                                                                                                | I 41/a                                                                             | I 41/a                                                                              | I 41/a                                                                              | I 41/a                                                                              | I 41/a                                                                              | I 41/a                                                                              | I 41/a                                                                              |
| a, Å                                    | 17.278(2)                                                                                                          | 17.1436(6)                                                                                                         | 17.063(1)                                                                                                          | 17.0389(17)                                                                                                        | 28.3249(19)                                                                        | 28.3123(19)                                                                         | 28.464(4)                                                                           | 28.440(3)                                                                           | 28.4011(18)                                                                         | 28.388(3)                                                                           | 28.3363(19)                                                                         |
| b, Å                                    | 17.861(2)                                                                                                          | 18.0998(6)                                                                                                         | 18.020(1)                                                                                                          | 17.9558(17)                                                                                                        | 28.3249(19)                                                                        | 28.3123(19)                                                                         | 28.464(4)                                                                           | 28.440(3)                                                                           | 28.4011(18)                                                                         | 28.388(3)                                                                           | 28.3363(19)                                                                         |
| c, Å                                    | 18.092(2)                                                                                                          | 18.3169(6)                                                                                                         | 18.284(1)                                                                                                          | 18.3397(19)                                                                                                        | 21.949(3)                                                                          | 21.934(3)                                                                           | 21.992(3)                                                                           | 22.010(5)                                                                           | 21.939(3)                                                                           | 22.036(5)                                                                           | 21.928(3)                                                                           |
| α, deg                                  | 82.207(5)                                                                                                          | 84.896(1)                                                                                                          | 84.728(2)                                                                                                          | 84.823(4)                                                                                                          | 90.00                                                                              | 90.000                                                                              | 90.00                                                                               | 90.00                                                                               | 90.00                                                                               | 90.000                                                                              | 90.00                                                                               |
| β, deg                                  | 71.356(5)                                                                                                          | 65.733(1)                                                                                                          | 65.772(2)                                                                                                          | 65.727(4)                                                                                                          | 90.00                                                                              | 90.000                                                                              | 90.00                                                                               | 90.00                                                                               | 90.00                                                                               | 90.000                                                                              | 90.00                                                                               |
| γ, deg                                  | 66.625(4)                                                                                                          | 71.546(1)                                                                                                          | 71.667(2)                                                                                                          | 71.616(4)                                                                                                          | 90.00                                                                              | 90.000                                                                              | 90.00                                                                               | 90.00                                                                               | 90.00                                                                               | 90.000                                                                              | 90.00                                                                               |
| V, Å <sup>3</sup>                       | 4855.7(10)                                                                                                         | 4909.4(3)                                                                                                          | 4862.1(5)                                                                                                          | 4848.9(8)                                                                                                          | 17609(3)                                                                           | 17582(3)                                                                            | 17817(4)                                                                            | 17803(5)                                                                            | 17696(3)                                                                            | 17758(5)                                                                            | 17607(3)                                                                            |
| Z                                       | 1                                                                                                                  | 1                                                                                                                  | 1                                                                                                                  | 1                                                                                                                  | 4                                                                                  | 4                                                                                   | 4                                                                                   | 4                                                                                   | 4                                                                                   | 4                                                                                   | 4                                                                                   |
| D <sub>calcd</sub> , g cm <sup>-3</sup> | 1.815                                                                                                              | 1.819                                                                                                              | 1.876                                                                                                              | 1.988                                                                                                              | 1.564                                                                              | 1.588                                                                               | 1.583                                                                               | 1.591                                                                               | 1.622                                                                               | 1.584                                                                               | 1.605                                                                               |
| T, K                                    | 223                                                                                                                | 223                                                                                                                | 223                                                                                                                | 223                                                                                                                | 223                                                                                | 223                                                                                 | 223                                                                                 | 223                                                                                 | 223                                                                                 | 223                                                                                 | 223                                                                                 |
| μ, mm <sup>-1</sup>                     | 1.447                                                                                                              | 1.564                                                                                                              | 1.722                                                                                                              | 1.821                                                                                                              | 0.561                                                                              | 0.589                                                                               | 0.630                                                                               | 0.658                                                                               | 0.692                                                                               | 0.713                                                                               | 0.742                                                                               |
| Unique reflns                           | 17141                                                                                                              | 17027                                                                                                              | 17129                                                                                                              | 16888                                                                                                              | 8607                                                                               | 7734                                                                                | 8723                                                                                | 8683                                                                                | 8627                                                                                | 8683                                                                                | 8619                                                                                |
| Obsd reflns                             | 10873                                                                                                              | 12318                                                                                                              | 12192                                                                                                              | 11768                                                                                                              | 5493                                                                               | 4921                                                                                | 5167                                                                                | 4206                                                                                | 4408                                                                                | 4065                                                                                | 4903                                                                                |
| Params                                  | 1103                                                                                                               | 1109                                                                                                               | 1082                                                                                                               | 1069                                                                                                               | 480                                                                                | 480                                                                                 | 480                                                                                 | 480                                                                                 | 480                                                                                 | 480                                                                                 | 480                                                                                 |
| R <sub>int</sub>                        | 0.0863                                                                                                             | 0.0547                                                                                                             | 0.0588                                                                                                             | 0.0792                                                                                                             | 0.0749                                                                             | 0.0859                                                                              | 0.0845                                                                              | 0.0874                                                                              | 0.1117                                                                              | 0.1019                                                                              | 0.0829                                                                              |

|                              |        |        |        |        |        |        |        |        |        |        |        |
|------------------------------|--------|--------|--------|--------|--------|--------|--------|--------|--------|--------|--------|
| $R[I > 2\sigma(I)]^a$        | 0.0679 | 0.0594 | 0.0687 | 0.1102 | 0.0894 | 0.0791 | 0.0832 | 0.0752 | 0.0880 | 0.0893 | 0.0775 |
| $wR[I > 2\sigma(I)]^b$       | 0.1885 | 0.1760 | 0.2066 | 0.3205 | 0.2683 | 0.2312 | 0.2333 | 0.2098 | 0.2448 | 0.2612 | 0.2289 |
| R(all data)                  | 0.0979 | 0.0777 | 0.0878 | 0.1313 | 0.1250 | 0.1109 | 0.1202 | 0.1363 | 0.1480 | 0.1579 | 0.1176 |
| $wR(\text{all data})$        | 0.2087 | 0.1934 | 0.2254 | 0.3432 | 0.2925 | 0.2506 | 0.2563 | 0.2323 | 0.2711 | 0.2945 | 0.2475 |
| GOF on $F^2$                 | 1.069  | 0.969  | 1.126  | 1.251  | 1.085  | 1.055  | 1.038  | 0.992  | 0.944  | 0.967  | 0.948  |
| The squeezed water molecules | 45     | 48     | 53     | 70     | 62     | 65     | 67     | 68     | 71     | 66     | 68     |

<sup>a</sup>  $R_1 = \sum ||F_o| - |F_c|| / \sum |F_o|$ . <sup>b</sup>  $wR_2 = |\sum w(|F_o|^2 - |F_c|^2) / \sum w(F_o)^2|^{1/2}$ , where  $w = 1 / [\sigma^2(F_o^2) + (aP)^2 + bP]$ ;  $P = (F_o^2 + 2F_c^2) / 3$ .

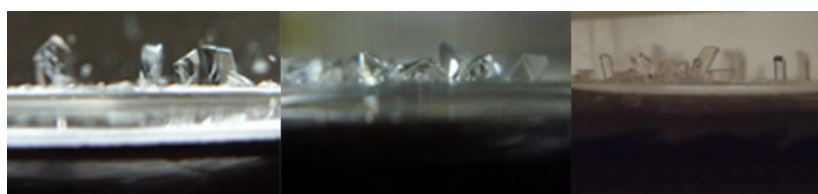

(a)

(b)

(c)

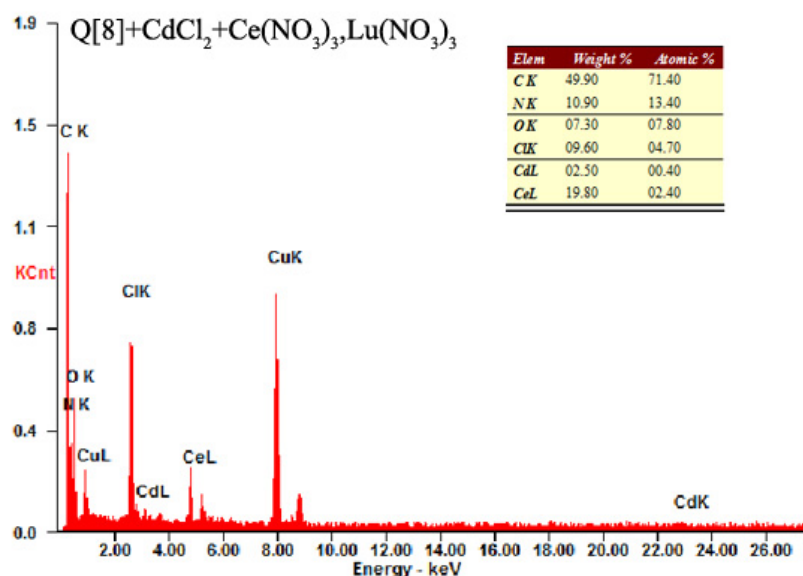

(d)

**Figure S1** Crystals grown from (a)  $Ce^{3+}$ -Q[6]-[CdCl<sub>4</sub>]<sup>2-</sup> system; (b)  $Lu^{3+}$ -Q[6]-[CdCl<sub>4</sub>]<sup>2-</sup> system; (c)  $Ce^{3+}$ - $Lu^{3+}$ -Q[6]-[CdCl<sub>4</sub>]<sup>2-</sup> system; and (d) electron spectroscopy data of the stick-like crystals from the Ce-Lu-Q[8]-[CdCl<sub>4</sub>]<sup>2-</sup> system.

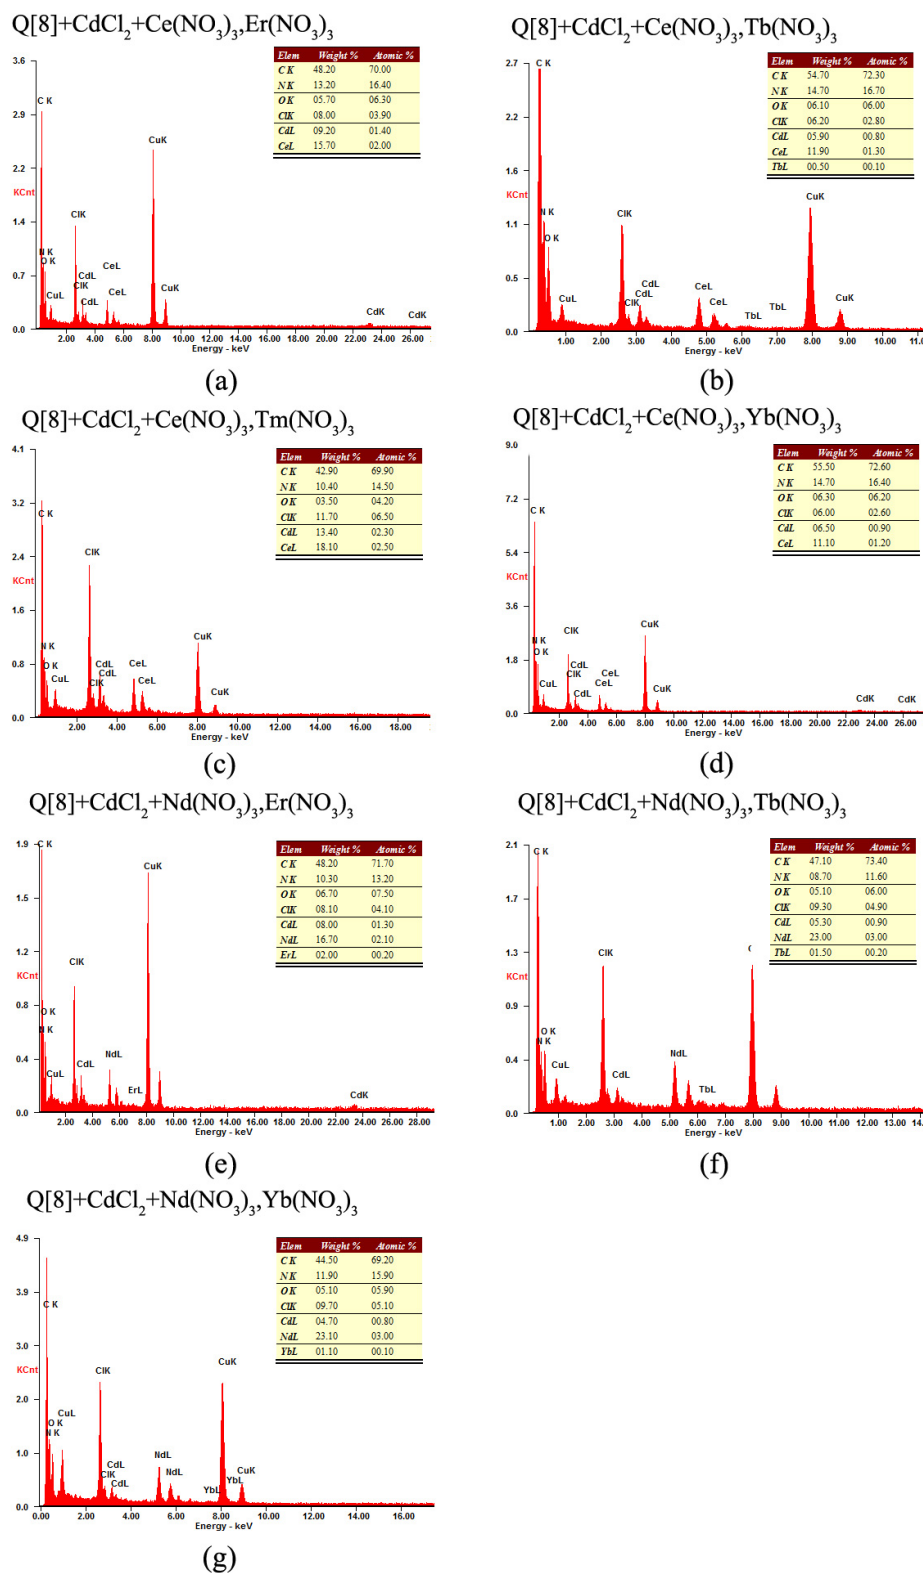

**Figure S2** Electron spectroscopies of the stick-like crystals from the (a) Ce-Er-; (b) Ce-Tb-; (c) Ce-Tm-; (d) Ce-Yb-; (e) Nd-Er-; (f) Nd-Tb-; (g) Nd-Yb-Q[8]-[CdCl<sub>4</sub>]<sup>2-</sup> systems.

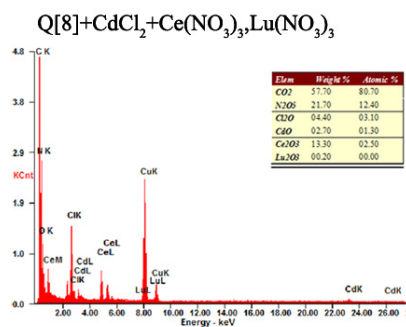

Ce:Lu=1:1

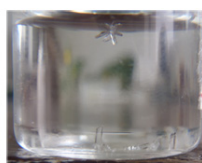

Production rate 41.44%

(a)

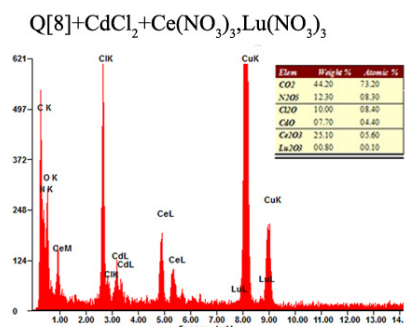

Ce:Lu=2:5

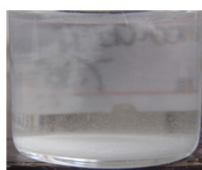

Production rate 24.06%

(b)

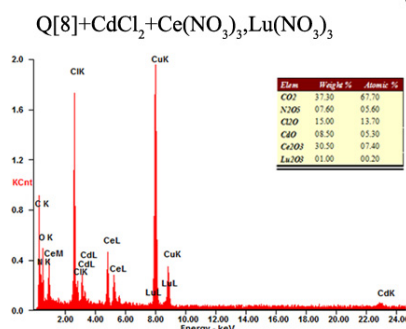

Ce:Lu=1:4

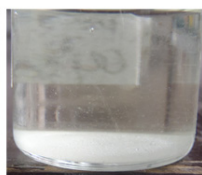

Production rate 19.67%

(c)

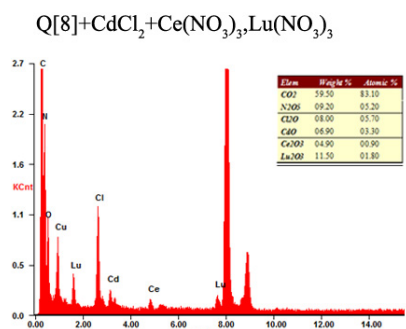

Ce:Lu=1:10

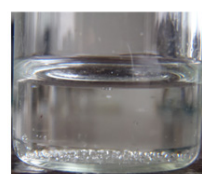

Production rate 48.41%

(d)

**Figure S3** Crystals grown from (a) a Ce<sup>3+</sup>-Lu<sup>3+</sup>-Q[8]-[CdCl<sub>4</sub>]<sup>2-</sup> system for the first time, (b) the same system with a supplementary Q[8]; (c) the same system with a supplementary Q[8] again and the corresponding electron spectroscopy of the crystals from this Ce-Lu-Q[8]-[CdCl<sub>4</sub>]<sup>2-</sup> system.

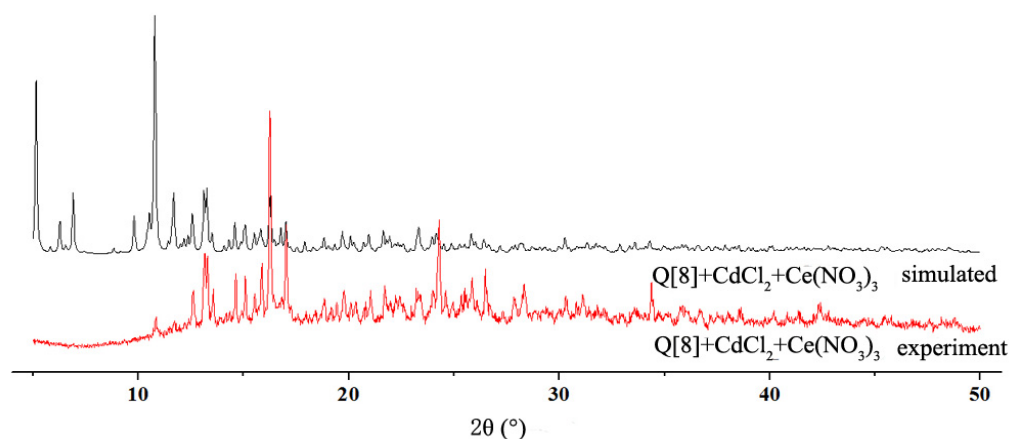

(a)

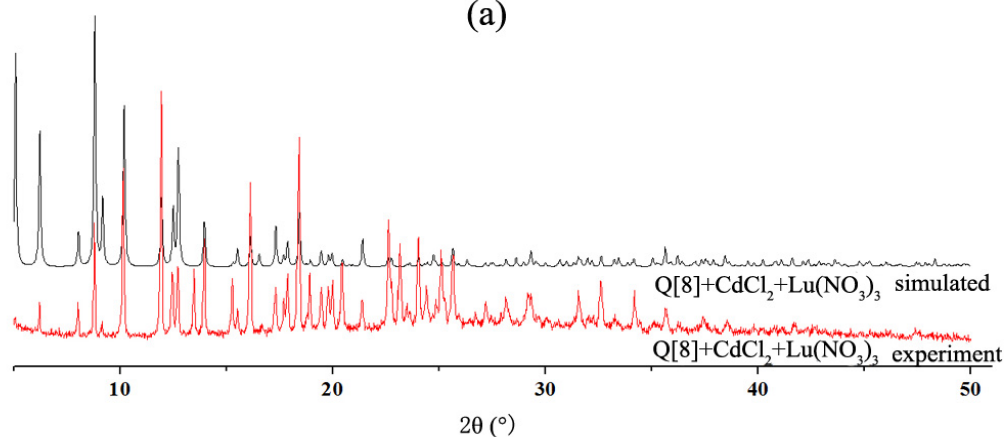

(b)

**Figure S4** Powder X-ray diffraction (PXRD) of the crystals from (a)  $\text{Ce}^{3+}$ -Q[8]-[CdCl<sub>4</sub>]<sup>2-</sup> and (b)  $\text{Lu}^{3+}$ -Q[8]-[CdCl<sub>4</sub>]<sup>2-</sup> systems respectively

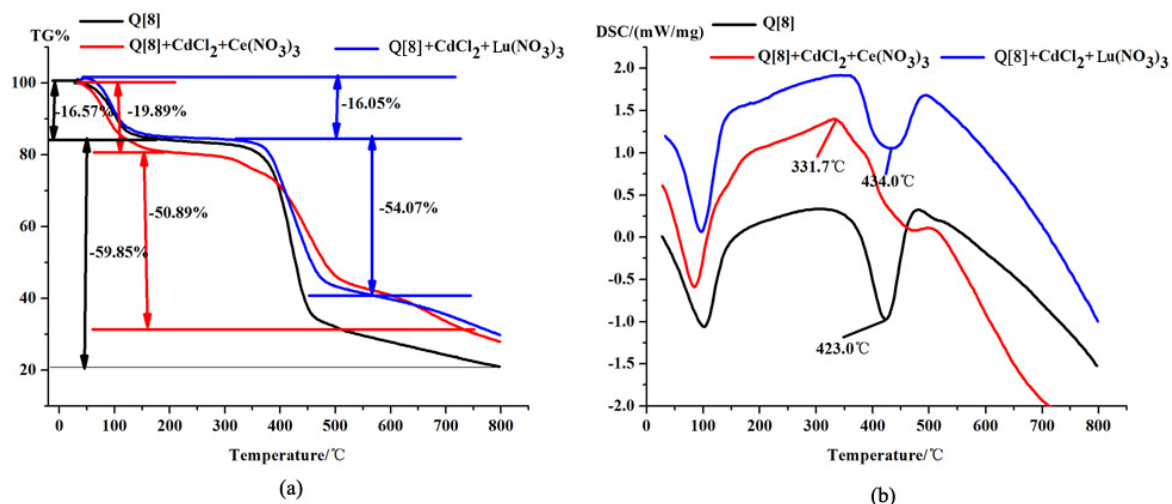

(a)

(b)

**Figure S5** DSC (left) and TG (right) curves of the crystals from  $\text{Ce}^{3+}$ -Q[8]-[CdCl<sub>4</sub>]<sup>2-</sup> and  $\text{Lu}^{3+}$ -Q[8]-[CdCl<sub>4</sub>]<sup>2-</sup> systems respectively with a comparison of Q[8] in N<sub>2</sub>
